# Supplementary material for: Impact of C-level positions on hospital performance: a scoping review protocol
Source: HighWire-hosted journal article supplement (doi:10.1136/bmjopen-2024-085655), 2024-07-01
Supplement: bmjopen-2024-085655supp002_data_supplement.pdf [file bmjopen-2024-085655supp002_data_supplement.pdf]

Appendix II: Data extraction tool

| Review Question                                                                                                                                      | Data to be extracted                   | Coding examples                                                                                                                                                                                                                                                                                          |
|------------------------------------------------------------------------------------------------------------------------------------------------------|----------------------------------------|----------------------------------------------------------------------------------------------------------------------------------------------------------------------------------------------------------------------------------------------------------------------------------------------------------|
| Review Question 1<br><br>General Information<br><br>“What are the methodological approaches in this field?”                                          | Authors/title                          | N/A                                                                                                                                                                                                                                                                                                      |
|                                                                                                                                                      | Year of publication                    | <ul style="list-style-type: none"><li>• Year of publication versus date of collected samples</li></ul>                                                                                                                                                                                                   |
|                                                                                                                                                      | Research Country                       | List of countries                                                                                                                                                                                                                                                                                        |
|                                                                                                                                                      | Research design                        | <div>Empirical study designs</div> <ul style="list-style-type: none"><li>• Quantitative (longitudinal vs. cross-sectional; statistical methods; survey)</li><li>• Qualitative (Interviews, open surveys)</li><li>• Mixed methods</li><li>• Limitations</li></ul>                                         |
|                                                                                                                                                      | Characteristics of hospitals           | <ul style="list-style-type: none"><li>• Public versus private ownership</li><li>• For-profit versus non-for-profit</li><li>• General vs specialist hospital vs hospital network</li><li>• Rural versus urban</li><li>• Data: publicly available versus not publicly available (self-collected)</li></ul> |
| Review Question 2<br><br>“Through which mechanisms or mediators have the hospital managers these impacts?”                                           | Aim/purpose of the study               | Description of the overall impacts on hospital performance by the top managers                                                                                                                                                                                                                           |
|                                                                                                                                                      | Leadership position / hospital manager | <ul style="list-style-type: none"><li>• Description of position (e.g. CMO, CFO, CXO, etc)</li><li>• Description of the responsibilities or tasks</li><li>• Use of strategy/mechanism (e.g. communication, leadership style)</li></ul>                                                                    |
| Review Question 3<br><br>“In what areas of hospital performance and through which hospital performance indicators have these impacts been realized?” | Type of impact on hospital performance | <ul style="list-style-type: none"><li>• Efficiency/utilization versus financial versus effectiveness</li></ul>                                                                                                                                                                                           |
|                                                                                                                                                      | Measurement of outcome                 | <ul style="list-style-type: none"><li>• Objective (e.g. KPI) versus subjective (self-assessment)</li></ul>                                                                                                                                                                                               |
|                                                                                                                                                      | Affected by the c-suite                | <ul style="list-style-type: none"><li>• Patients, staff, stakeholders</li><li>• Inside versus outside the organization</li><li>• Hospital wide versus several departments vs single department</li></ul>                                                                                                 |
